# Supplementary material
Source: Springer Nature journal article supplement (https://www.springermedizin.de/resource/supplementary/13012_2010_416_MOESM5_ESM.pdf/9629964)
Supplement: MOESM5 [file 9629964]

| Elements | (Sub-elements)                     | Criteria                                                                                                                                                                                                                                                                                                                                                       |
|----------|------------------------------------|----------------------------------------------------------------------------------------------------------------------------------------------------------------------------------------------------------------------------------------------------------------------------------------------------------------------------------------------------------------|
| Evidence | Research                           | Well conceived, designed and executed research<br>Seen as one part of a decision<br>Valued as evidence<br>Lack of certainty acknowledged<br>Social construction acknowledged<br>Judged as relevant<br>Importance weighted<br>Conclusions drawn                                                                                                                 |
|          | Clinical experience                | Clinical experience and expertise reflected upon, tested by individuals and groups<br>Consensus within similar groups<br>Valued as evidence<br>Seen as one part of a decision<br>Judged as relevant<br>Importance weighted<br>Conclusions drawn                                                                                                                |
|          | Patient experience                 | Valued as evidence<br>Multiple biographies used<br>Partnerships with health care professionals<br>Seen as one part of a decision<br>Judged as relevant<br>Importance weighted<br>Conclusions drawn                                                                                                                                                             |
|          | Information from the local context | Valued as evidence<br>Collected and analyzed systematically and rigorously<br>Evaluated and reflected upon<br>Conclusions drawn                                                                                                                                                                                                                                |
| Context  | Receptive context                  | Physical<br>Social<br>Cultural<br>Structural<br>System<br>Professional/social networks                                                                                                                                                                                                                                                                         |
|          |                                    | Appropriate & transparent decision making processes<br>Power and authority processes<br>Resources – human, financial, equipment – allocated and Information and feedback<br>Initiative fits with strategic goals and is a key practice/patient issue<br>Receptiveness to change                                                                                |
|          | Culture                            | Able to define culture(s) in terms of prevailing values/beliefs<br>Values individual staff and clients<br>Promotes leaning organization<br>Consistency of individuals role/experience to value: <ul style="list-style-type: none"> <li>- relationship with others</li> <li>- teamwork</li> <li>- power and authority</li> <li>- rewards/recognition</li> </ul> |
|          | Leadership                         | Transformational leadership<br>Role clarity<br>Effective teamwork<br>Effective organizational structures<br>Democratic inclusive decision making processes<br>Enabling/empowering approach to teaching/learning/managing                                                                                                                                       |
|          | Evaluation                         | Feedback on: <ul style="list-style-type: none"> <li>- individual</li> <li>- team</li> <li>- system</li> </ul> Use of multiple sources of information on performance<br>Use of multiple methods: <ul style="list-style-type: none"> <li>- Clinical</li> <li>- Performance</li> <li>- Economic</li> <li>- Experience</li> </ul>                                  |
|          |                                    |                                                                                                                                                                                                                                                                                                                                                                |

| Facilitation | Purpose             | Task                                                                                                                                                                                                                                                     | Holistic                                                                                                                                                                                                                                           |
|--------------|---------------------|----------------------------------------------------------------------------------------------------------------------------------------------------------------------------------------------------------------------------------------------------------|----------------------------------------------------------------------------------------------------------------------------------------------------------------------------------------------------------------------------------------------------|
|              | Role                | Doing for others <ul style="list-style-type: none"> <li>- Episodic contact</li> <li>- Practical/technical help</li> <li>- Didactic, traditional approach to teaching</li> <li>- External agents</li> <li>- Low-intensity – extensive coverage</li> </ul> | Enabling others <ul style="list-style-type: none"> <li>- Sustained partnership</li> <li>- Developmental</li> <li>- Adult learning approach to teaching</li> <li>- Internal/external agents</li> <li>- High-intensity – limited coverage</li> </ul> |
|              | Skills & attributes | Task/doing for others <ul style="list-style-type: none"> <li>- Project management skills</li> <li>- Technical skills</li> <li>- Marketing skills</li> <li>- Subject/technical/clinical credibility</li> </ul>                                            | Holistic/enabling <ul style="list-style-type: none"> <li>- Co-counselling</li> <li>- Critical reflection</li> <li>- Giving meaning</li> <li>- Flexibility of role</li> <li>- Realness/authenticity</li> </ul>                                      |
